# Supplementary material for: Targeted Metabolomics With Ultraperformance Liquid Chromatography–Mass Spectrometry (UPLC-MS) Highlights Metabolic Differences in Healthy and Atopic Staffordshire Bull Terriers Fed Two Different Diets, A Pilot Study
Source: Front Vet Sci. 2020 Oct 27;7:554296. doi: 10.3389/fvets.2020.554296 (PMC7653775; doi:10.3389/fvets.2020.554296)
Supplement: Supplementary file 2 [file Table_2.xlsx]

## Sheet: Targeted Metabolomics list, all
Match	HMDB	PubChem	ChEBI	KEGG	METLIN	Comment
Glycine	HMDB0000123	750	15428	C00037	20	1
Trimethylamine N-oxide	HMDB0000925	1145	15724	C01104	5876	1
L-Alanine	HMDB0000161	5950	16977	C00041	NA	1
Glyceraldehyde	HMDB0001051	751	5445	C02154	4176	1
Gamma-Aminobutyric acid	HMDB0000112	119	16865	C00334	NA	1
Dimethylglycine	HMDB0000092	673	17724	C01026	277	1
2-Aminoisobutyric acid	HMDB0001906	6119	27971	C03665	37	1
Choline	HMDB0000097	305	15354	C00114	56	1
L-Serine	HMDB0000187	5951	17115	C00065	5203	1
Cytosine	HMDB0000630	597	16040	C00380	283	1
Creatinine	HMDB0000562	588	16737	C00791	8	1
L-Proline	HMDB0000162	145742	17203	C00148	29	1
Betaine	HMDB0000043	247	17750	C00719	287	1
L-Valine	HMDB0000883	6287	16414	C00183	5842	1
Guanidoacetic acid	HMDB0000128	763	16344	C00581	5163	1
Niacinamide	HMDB0001406	936	17154	C00153	1497	1
Taurine	HMDB0000251	1123	15891	C00245	31	1
1-Methylhistamine	HMDB0000898	3614	29009	C05127	5854	1
L-Isoleucine	HMDB0000172	6306	17191	C00407	5193	1
4-Hydroxyproline	HMDB0000725	5810	18095	C01157	257	1
L-Asparagine	HMDB0000168	6267	17196	C00152	14	1
Ornithine	HMDB0000214	6262	15729	C00077	27	1
L-Leucine	HMDB0000687	6106	15603	C00123	24	1
Creatine	HMDB0000064	586	16919	C00300	7	1
L-Aspartic acid	HMDB0000191	5960	17053	C00049	5206	1
3-Hydroxyanthranilic acid	HMDB0001476	86	15793	C00632	3275	1
Adenine	HMDB0000034	190	16708	C00147	85	1
Homocysteine	HMDB0000742	778	17230	C00155	3256	1
Hypoxanthine	HMDB0000157	790	17368	C00262	83	1
O-Phosphoethanolamine	HMDB0000224	1015	17553	C00346	5233	1
Spermidine	HMDB0001257	1102	16610	C00315	254	1
L-Lysine	HMDB0000182	5962	18019	C00047	5200	1
L-Glutamine	HMDB0000641	5961	18050	C00064	5614	1
L-Glutamic acid	HMDB0000148	33032	16015	C00025	5174	1
L-Methionine	HMDB0000696	6137	16643	C00073	5664	1
L-Histidine	HMDB0000177	6274	15971	C00135	21	1
L-Carnitine	HMDB0000062	2724480	11060	C00318	52	1
Normetanephrine	HMDB0000819	1237	144308	C05589	66	1
L-Phenylalanine	HMDB0000159	6140	17295	C00079	28	1
Pyridoxine	HMDB0000239	1054	16709	C00314	5245	1
L-Arginine	HMDB0000517	6322	16467	C00062	5502	1
Citrulline	HMDB0000904	9750	16349	C00327	16	1
Cotinine	HMDB0001046	408	127762		1531	1
Hippuric acid	HMDB0000714	464	18089	C01586	1301	1
L-Tyrosine	HMDB0000158	6057	17895	C00082	34	1
4-Pyridoxic acid	HMDB0000017	6723	17405	C00847	239	1
Kynurenic acid	HMDB0000715	3845	18344	C01717	5683	1
5-Hydroxyindoleacetic acid	HMDB0000763	1826	27823	C05635	2975	1
Symmetric dimethylarginine	HMDB0003334	169148	61914	C03626	6891	1
Asymmetric dimethylarginine	HMDB0001539	123831	17929	C03626	6309	1
L-Tryptophan	HMDB0000929	6305	16828	C00078	5879	1
L-Kynurenine	HMDB0000684	161166	16946	C00328	72	1
Pantothenic acid	HMDB0000210	988	7916	C00864	241	1
5-Hydroxy-L-tryptophan	HMDB0000472	144	28171	C01017	NA	1
L-Cystathionine	HMDB0000099	439258	17482	C02291	39	1
Hydroxykynurenine	HMDB0000732	89	1547	C02794	5700	1
Deoxycytidine	HMDB0000014	13711	15698	C00881	3367	1
Cytidine	HMDB0000089	6175	17562	C00475	3376	1
Carnosine	HMDB0000033	439224	15727	C00386	38	1
Neopterin	HMDB0000845	4455	NA	C05926	248	1
Adenosine	HMDB0000050	60961	16335	C00212	86	1
Xanthosine	HMDB0000299	64959	18107	C01762	3408	1
Glutathione	HMDB0000125	124886	16856	C00051	44	1
Cyclic AMP	HMDB0000058	6076	17489	C00575	5120	1
Adenosine monophosphate	HMDB0000045	6083	16027	C00020	5111	1
Folic acid	HMDB0000121	6037	27470	C00504	246	1
NAD	HMDB0000902	5893	15846	C00003	5858	1
Acetoacetic acid	HMDB0000060	96	15344	C00164	276	1
Uracil	HMDB0000300	1174	17568	C00106	258	1
Succinic acid	HMDB0000254	1110	15741	C00042	114	1
L-Homoserine	HMDB0000719	12647	15699	C00263	5687	1
L-Threonine	HMDB0000167	6288	16857	C00188	32	1
Nicotinic acid	HMDB0001488	938	15940	C00253	6272	1
Xanthine	HMDB0000292	1188	17712	C00385	82	1
Orotic acid	HMDB0000226	967	16742	C00295	318	1
Allantoin	HMDB0000462	204	15676	C01551	89	1
Aminoadipic acid	HMDB0000510	469	37024	C00956	5496	1
Homogentisic acid	HMDB0000130	780	44747	C00544	331	1
myo-Inositol	HMDB0000211	NA	17268	C00137	5221	1
Sorbitol	HMDB0000247	5780	17924	C00794	143	1
D-Glucuronic acid	HMDB0000127	444791	42717	C00191	161	1
Deoxyuridine	HMDB0000012	13712	16450	C00526	5086	1
D-Ribose 5-phosphate	HMDB0001548	439167	52742	C00117	6315	1
gamma-Glutamylcysteine	HMDB0001049	123938	17515	C00669	5966	1
Inosine	HMDB0000195	6021	17596	C00294	84	1
Guanosine	HMDB0000133	6802	16750	C00387	87	1
Sucrose	HMDB0000258	5988	17992	C00089	137	1
Cyclic GMP	HMDB0001314	24316	16356	C00942	6152	1
Inosinic acid	HMDB0000175	8582	17202	C00130	5196	1
Chenodeoxycholic acid	HMDB0000518	10133	16755	C02528	207	1
Cholic acid	HMDB0000619	221493	16359	C00695	206	1
Glycocholic acid	HMDB0000138	23617285	29746	C01921	5169	1
Taurochenodesoxycholic acid	HMDB0000951	387316	16525	C05465	5897	1
Taurocholic acid	HMDB0000036	440567	28865	C05122	5104	1
Uridine diphosphate glucose	HMDB0000286	53477679	NA	C00029	5278	1
L-Acetylcarnitine	HMDB0000201	1	NA	C02571	5213	1
Propionylcarnitine	HMDB0000824	107738	28867	C03017	5787	1
Isobutyryl-L-carnitine	HMDB0000736	10177002	73017		5704	1
Isovalerylcarnitine	HMDB0000688	6426851	73025		5657	1
Hexanoylcarnitine	HMDB0000705	6426853	70749		5673	1
L-Octanoylcarnitine	HMDB0000791	11953814	18102	C02838	NA	1
Decanoylcarnitine	HMDB0000651	10245190	68830		5623	1

## Sheet: Kegg IDs
C00037
C01104
C00041
C02154
C00334
C01026
C03665
C00114
C00065
C00380
C00791
C00148
C00719
C00183
C00581
C00153
C00245
C05127
C00407
C01157
C00152
C00077
C00123
C00300
C00049
C00632
C00147
C00155
C00262
C00346
C00315
C00047
C00064
C00025
C00073
C00135
C00318
C05589
C00079
C00314
C00062
C00327
C01586
C00082
C00847
C01717
C05635
C03626
C03626
C00078
C00328
C00864
C01017
C02291
C02794
C00881
C00475
C00386
C05926
C00212
C01762
C00051
C00575
C00020
C00504
C00003
C00164
C00106
C00042
C00263
C00188
C00253
C00385
C00295
C01551
C00956
C00544
C00137
C00794
C00191
C00526
C00117
C00669
C00294
C00387
C00089
C00942
C00130
C02528
C00695
C01921
C05465
C05122
C00029
C02571
C03017
C02838
